# Supplementary material for: 2D hexagonal boron nitride for solar energy conversions
Source: PeerJ journal article supplement (doi:10.7717/peerj-matsci.27), 2023-03-29
Supplement: SuppFigs.pdf [file SuppFigs.pdf]

## 2D hexagonal boron nitride for solar energy conversions

*A.A. Ramanathan*

The University of Jordan, department of Physics, Amman-11942, Jordan

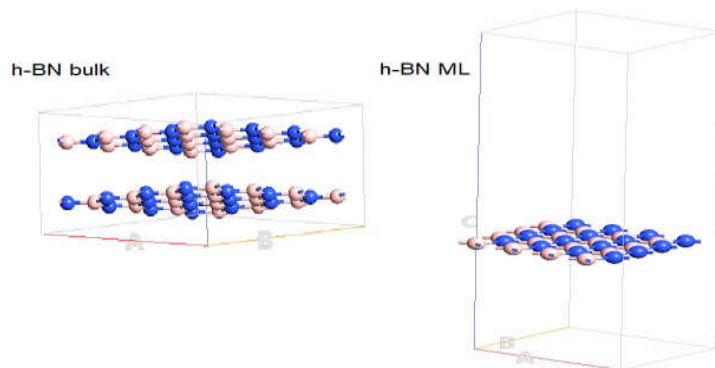

**Figure S1.** The h-BN bulk (left panel) and ML (right panel) structures, Blue and cream color represent B and N atoms respectively

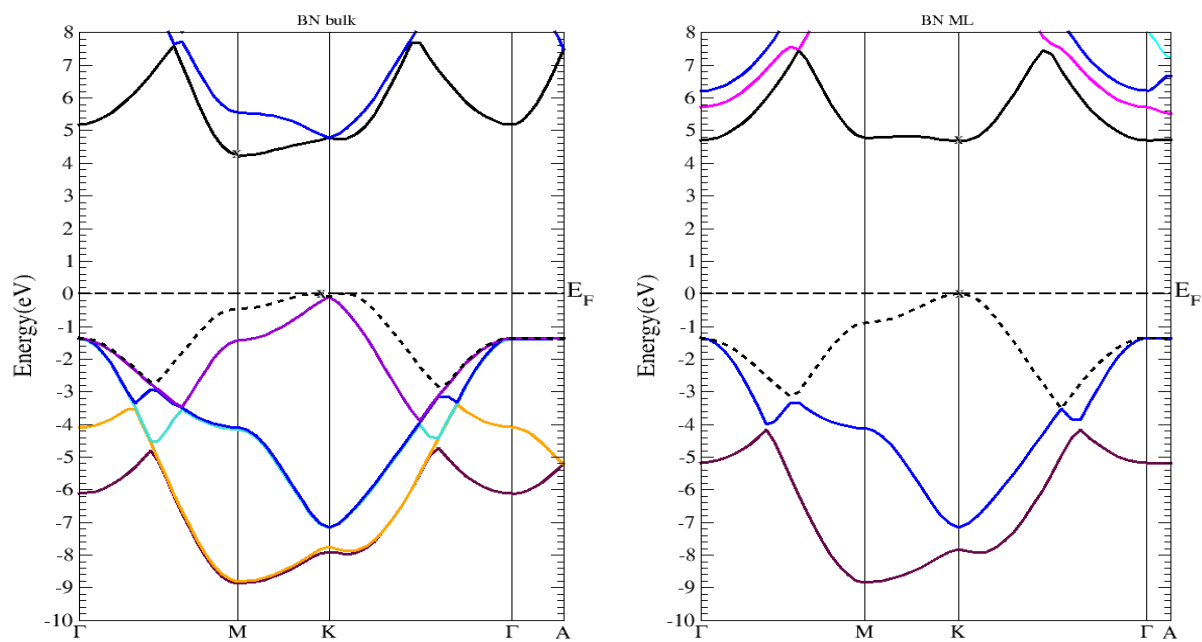

**Figure S2.** The h-BN bulk (left panel) and ML (right panel) band structures

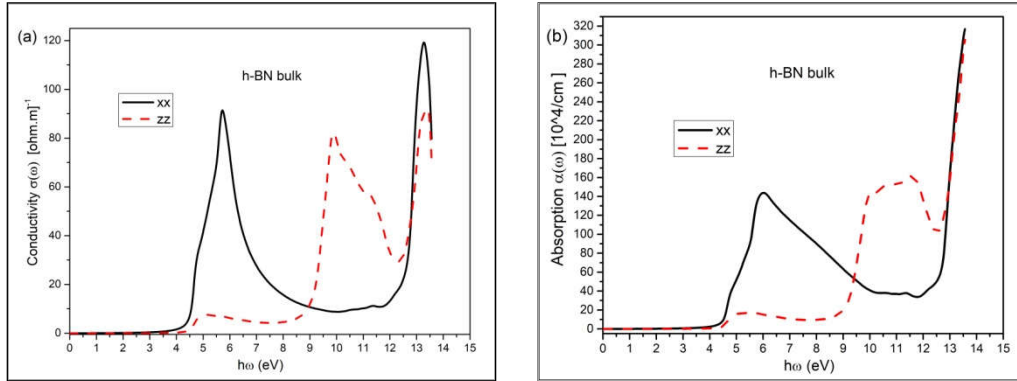

**Figure S3.** The optical conductivities (a) and absorption coefficients (b) for h-BN bulk in the xx and zz directions

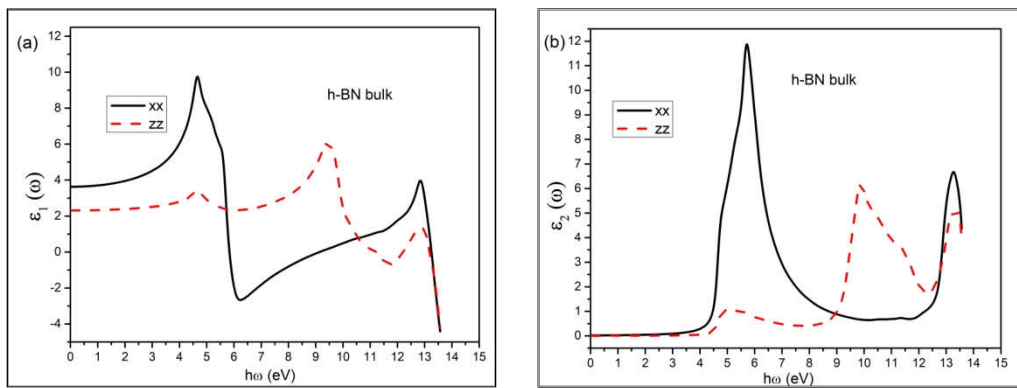

**Figure S4.** The real (a) and imaginary (b) parts of the dielectric function in the xx and zz directions for bulk h-BN

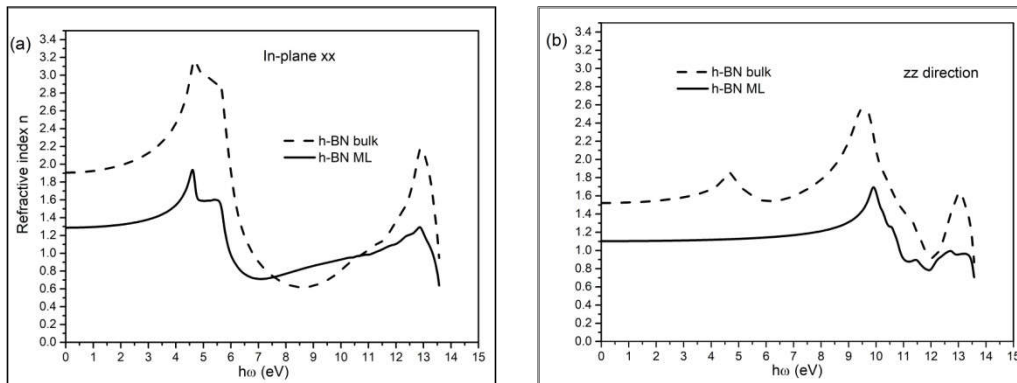

**Figure S5.** The refractive indices of h-BN bulk and ML in (a) the xx and (b) zz directions

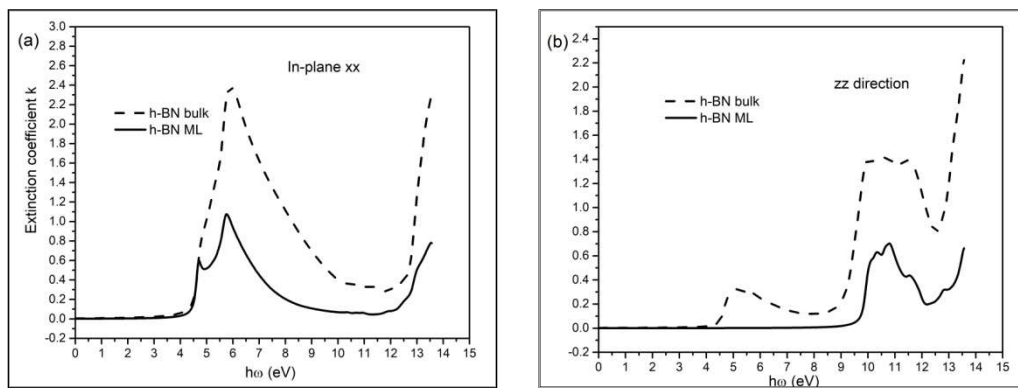

**Figure S6.** The extinction coefficients of h-BN bulk and ML in (a) the xx and (b) zz directions
